# Supplementary material for: First Clarification of the Involvement of Glycosyltransferase MdUGT73CG22 in the Detoxification Metabolism of Nicosulfuron in Apple
Source: MDPI journal article supplement (doi:10.3390/plants13091171), 2024-04-23
Supplement: s1 [file s1]

Table S1 mRNA expression of 9 glycosyltransferase genes induced by class 12 acetolactate synthase (ALS) inhibitor herbicides

| Chemical compounds | Time (h)     | MdUGT 73B36     | MdUGT 73B37     | MdUGT 73B38     | MdUGT 73B39     | MdUGT 73B40     | MdUGT 73CG21     | MdUGT 73CG22     | MdUGT 73CP3      | MdUGT 73AC7     |                 |
|--------------------|--------------|-----------------|-----------------|-----------------|-----------------|-----------------|------------------|------------------|------------------|-----------------|-----------------|
| Bensulfuron methyl | 0            | 1.00 ± 0.102    | 1.00 ± 0.107    | 1.00 ± 0.114    | 1.00 ± 0.105    | 1.00 ± 0.114    | 1.00 ± 0.109     | 1.00 ± 0.110     | 1.00 ± 0.102     | 1.00 ± 0.097    |                 |
|                    |              | 2.487 ± 0.249*  | 2.573 ± 0.284*  | 2.629 ± 0.218*  | 2.545 ± 0.197*  | 2.397 ± 0.183*  | 4.856 ± 0.378**  | 6.901 ± 0.425**  | 3.317 ± 0.243*   | 1.593 ± 0.227   |                 |
|                    | 3            | 3.592 ± 0.317*  | 3.104 ± 0.295*  | 3.263 ± 0.226*  | 4.183 ± 0.284*  | 4.682 ± 0.275*  | 6.294 ± 0.391**  | 7.461 ± 0.438**  | 4.207 ± 0.269*   | 3.214 ± 0.257*  |                 |
|                    |              | 2.861 ± 0.232*  | 3.585 ± 0.273*  | 2.758 ± 0.229*  | 3.759 ± 0.315*  | 3.206 ± 0.227*  | 5.191 ± 0.326*   | 5.698 ± 0.394**  | 3.583 ± 0.224*   | 2.475 ± 0.212*  |                 |
|                    | 6            | 1.576 ± 0.085   | 2.408 ± 0.021*  | 2.174 ± 0.236*  | 2.103 ± 0.128   | 3.083 ± 0.194*  | 3.958 ± 0.327*   | 4.206 ± 0.332*   | 3.106 ± 0.218*   | 2.196 ± 0.184*  |                 |
|                    |              | 1.00 ± 0.108    | 1.00 ± 0.112    | 1.00 ± 0.124    | 1.00 ± 0.117    | 1.00 ± 0.131    | 1.00 ± 0.121     | 1.00 ± 0.109     | 1.00 ± 0.113     | 1.00 ± 0.118    |                 |
|                    | 12           | 3.594 ± 0.284*  | 5.302 ± 0.312*  | 6.394 ± 0.407** | 5.390 ± 0.295*  | 4.495 ± 0.267*  | 8.683 ± 0.462**  | 16.289 ± 0.353** | 6.283 ± 0.451**  | 5.253 ± 0.474** |                 |
|                    |              | 5.275 ± 0.391** | 7.498 ± 0.472** | 5.192 ± 0.383** | 4.298 ± 0.296*  | 3.587 ± 0.385** | 10.475 ± 0.571** | 27.475 ± 0.624** | 8.496 ± 0.538**  | 5.968 ± 0.472** |                 |
|                    | 24           | 5.478 ± 0.218*  | 6.114 ± 0.294*  | 3.576 ± 0.177*  | 3.174 ± 0.195*  | 2.576 ± 0.326*  | 7.362 ± 0.298*   | 22.287 ± 0.312*  | 7.365 ± 0.283*   | 6.028 ± 0.197*  |                 |
|                    |              | 4.372 ± 0.329*  | 4.084 ± 0.276** | 2.057 ± 0.215*  | 2.945 ± 0.195*  | 2.108 ± 0.226*  | 5.476 ± 0.321*   | 18.488 ± 0.274*  | 6.274 ± 0.325*   | 4.294 ± 0.269*  |                 |
|                    | Nicosulfuron | 0               | 1.00 ± 0.102    | 1.00 ± 0.089    | 1.00 ± 0.091    | 1.00 ± 0.113    | 1.00 ± 0.121     | 1.00 ± 0.107     | 1.00 ± 0.105     | 1.00 ± 0.124    | 1.00 ± 0.116    |
|                    |              |                 | 2.498 ± 0.203*  | 3.108 ± 0.227*  | 3.506 ± 0.324*  | 2.475 ± 0.193*  | 4.059 ± 0.272*   | 5.867 ± 0.393**  | 9.275 ± 0.611**  | 7.593 ± 0.526** | 5.968 ± 0.341** |
| 3                  |              | 3.104 ± 0.202*  | 4.285 ± 0.271*  | 4.967 ± 0.314*  | 2.183 ± 0.156   | 5.290 ± 0.494** | 6.193 ± 0.452**  | 13.573 ± 0.675** | 10.437 ± 0.518** | 4.677 ± 0.305*  |                 |
|                    |              | 3.587 ± 0.226*  | 5.227 ± 0.313*  | 3.264 ± 0.237*  | 1.941 ± 0.106   | 3.924 ± 0.191*  | 7.958 ± 0.425**  | 10.486 ± 0.608** | 7.079 ± 0.436**  | 3.86 ± 0.284*   |                 |
| 6                  |              | 1.951 ± 0.104   | 3.296 ± 0.192*  | 2.813 ± 0.175   | 1.756 ± 0.126   | 2.856 ± 0.174   | 4.204 ± 0.309*   | 7.497 ± 0.516**  | 5.398 ± 0.347**  | 2.913 ± 0.206*  |                 |
|                    |              | 1.00 ± 0.109    | 1.00 ± 0.105    | 1.00 ± 0.102    | 1.00 ± 0.095    | 1.00 ± 0.097    | 1.00 ± 0.099     | 1.00 ± 0.101     | 1.00 ± 0.112     | 1.00 ± 0.106    |                 |
| 12                 |              | 1.958 ± 0.116   | 2.057 ± 0.184*  | 3.912 ± 0.253*  | 3.205 ± 0.157   | 2.497 ± 0.195*  | 3.576 ± 0.264*   | 4.587 ± 0.295*   | 3.857 ± 0.291*   | 3.595 ± 0.246*  |                 |
|                    |              | 2.475 ± 0.206*  | 3.186 ± 0.292*  | 5.364 ± 0.427** | 4.592 ± 0.314*  | 3.185 ± 0.196*  | 3.958 ± 0.257*   | 5.920 ± 0.475**  | 3.184 ± 0.246*   | 4.952 ± 0.395** |                 |
| 24                 |              | 3.049 ± 0.273*  | 4.208 ± 0.377** | 6.721 ± 0.426** | 5.365 ± 0.348** | 3.596 ± 0.207*  | 4.697 ± 0.394**  | 4.867 ± 0.326**  | 2.172 ± 0.195*   | 2.954 ± 0.212*  |                 |
|                    |              | 2.176 ± 0.176   | 3.756 ± 0.176   | 4.598 ± 0.176   | 6.358 ± 0.176   | 3.284 ± 0.176   | 3.458 ± 0.176    | 4.103 ± 0.176    | 1.485 ± 0.176    | 2.193 ± 0.176   |                 |

|              |    |         |         |         |         |         |         |         |         |         |
|--------------|----|---------|---------|---------|---------|---------|---------|---------|---------|---------|
| Metsulfuron  | 0  | 0.225*  | 0.298*  | 0.342** | 0.487** | 0.192*  | 0.242*  | 0.375** | 0.107   | 0.214*  |
|              |    | 1.00 ±  | 1.00 ±  | 1.00 ±  | 1.00 ±  | 1.00 ±  | 1.00 ±  | 1.00 ±  | 1.00 ±  | 1.00 ±  |
|              |    | 0.095   | 0.098   | 0.112   | 0.114   | 0.112   | 0.109   | 0.106   | 0.103   | 0.089   |
|              | 3  | 2.986 ± | 3.586 ± | 4.598 ± | 3.943 ± | 4.523 ± | 3.598 ± | 5.393 ± | 3.718 ± | 2.746 ± |
|              |    | 0.224*  | 0.312*  | 0.389** | 0.316*  | 0.328*  | 0.314*  | 0.407** | 0.307*  | 0.224*  |
|              | 6  | 3.697 ± | 4.592 ± | 3.576 ± | 4.695 ± | 3.209 ± | 3.193 ± | 6.892 ± | 2.905 ± | 2.403 ± |
|              |    | 0.313*  | 0.339** | 0.284*  | 0.397** | 0.247*  | 0.225*  | 0.416** | 0.217*  | 0.211*  |
|              | 12 | 2.465 ± | 5.258 ± | 4.052 ± | 3.291 ± | 2.985 ± | 2.857 ± | 5.304 ± | 2.164 ± | 1.725 ± |
|              |    | 0.178*  | 0.472** | 0.345** | 0.283*  | 0.226*  | 0.279*  | 0.264** | 0.172*  | 0.153   |
|              | 24 | 1.758 ± | 3.591 ± | 2.527 ± | 2.476 ± | 1.756 ± | 2.475 ± | 3.068 ± | 1.957 ± | 1.590 ± |
|              |    | 0.126   | 0.197*  | 0.173*  | 0.192*  | 0.086   | 0.158*  | 0.247*  | 0.139   | 0.103   |
|              | 0  | 1.00 ±  | 1.00 ±  | 1.00 ±  | 1.00 ±  | 1.00 ±  | 1.00 ±  | 1.00 ±  | 1.00 ±  | 1.00 ±  |
|              |    | 0.101   | 0.114   | 0.118   | 0.112   | 0.093   | 0.095   | 0.097   | 0.102   | 0.105   |
|              | 3  | 3.194 ± | 2.457 ± | 1.598 ± | 3.967 ± | 2.941 ± | 2.847 ± | 4.596 ± | 4.209 ± | 5.212 ± |
|              |    | 0.287*  | 0.205*  | 0.117   | 0.286*  | 0.254*  | 0.212*  | 0.339** | 0.327*  | 0.356** |
|              | 6  | 4.875 ± | 3.269 ± | 2.587 ± | 5.182 ± | 4.952 ± | 3.492 ± | 5.291 ± | 3.586 ± | 3.298 ± |
|              |    | 0.384** | 0.291*  | 0.216*  | 0.317*  | 0.338** | 0.286*  | 0.299*  | 0.312*  | 0.300*  |
| Triasulfuron | 12 | 2.986 ± | 2.173 ± | 3.736 ± | 4.295 ± | 3.687 ± | 3.103 ± | 3.059 ± | 2.375 ± | 2.985 ± |
|              |    | 0.183*  | 0.179*  | 0.242*  | 0.309*  | 0.273*  | 0.295*  | 0.178*  | 0.168*  | 0.217*  |
|              | 24 | 2.473 ± | 2.048 ± | 2.592 ± | 3.698 ± | 3.139 ± | 2.171 ± | 2.506 ± | 2.109 ± | 2.174 ± |
|              |    | 0.195*  | 0.181*  | 0.213*  | 0.226*  | 0.295*  | 0.204*  | 0.194*  | 0.183*  | 0.169*  |
|              | 0  | 1.00 ±  | 1.00 ±  | 1.00 ±  | 1.00 ±  | 1.00 ±  | 1.00 ±  | 1.00 ±  | 1.00 ±  | 1.00 ±  |
|              |    | 0.126   | 0.118   | 0.115   | 0.113   | 0.109   | 0.110   | 0.101   | 0.098   | 0.104   |
|              | 3  | 4.295 ± | 3.941 ± | 5.282 ± | 4.287 ± | 3.953 ± | 3.917 ± | 4.576 ± | 3.961 ± | 3.738 ± |
|              |    | 0.371** | 0.312*  | 0.420** | 0.323*  | 0.297*  | 0.248*  | 0.374** | 0.392*  | 0.329*  |
|              | 6  | 5.957 ± | 3.276 ± | 3.953 ± | 3.952 ± | 3.274 ± | 3.094 ± | 5.689 ± | 3.295 ± | 2.584 ± |
|              |    | 0.414** | 0.293*  | 0.317*  | 0.287*  | 0.306*  | 0.232*  | 0.513** | 0.319*  | 0.209** |
|              | 12 | 3.541 ± | 2.478 ± | 3.747 ± | 3.648 ± | 2.792 ± | 2.479 ± | 4.275 ± | 2.472 ± | 2.103 ± |
|              |    | 0.272*  | 0.220*  | 0.295*  | 0.262*  | 0.245*  | 0.216*  | 0.335** | 0.224*  | 0.182*  |
|              | 24 | 3.208 ± | 2.103 ± | 3.029 ± | 3.209 ± | 2.165 ± | 2.153 ± | 3.136 ± | 2.109 ± | 1.712 ± |
|              |    | 0.271*  | 0.192*  | 0.325*  | 0.247*  | 0.197*  | 0.204*  | 0.295*  | 0.157*  | 0.143   |
| Cinosulfuron | 0  | 1.00 ±  | 1.00 ±  | 1.00 ±  | 1.00 ±  | 1.00 ±  | 1.00 ±  | 1.00 ±  | 1.00 ±  | 1.00 ±  |
|              |    | 0.112   | 0.115   | 0.108   | 0.114   | 0.109   | 0.110   | 0.113   | 0.121   | 0.117   |
|              | 3  | 4.495 ± | 5.067 ± | 3.587 ± | 4.693 ± | 4.142 ± | 3.673 ± | 4.593 ± | 3.103 ± | 2.757 ± |
|              |    | 0.325*  | 0.419** | 0.272*  | 0.401** | 0.275*  | 0.322*  | 0.373** | 0.227*  | 0.206*  |
|              | 6  | 3.957 ± | 3.953 ± | 2.746 ± | 3.405 ± | 2.498 ± | 2.487 ± | 3.193 ± | 2.164 ± | 2.536 ± |
|              |    | 0.328*  | 0.291*  | 0.224*  | 0.325*  | 0.229*  | 0.195*  | 0.225*  | 0.127*  | 0.159*  |
|              | 12 | 3.162 ± | 3.714 ± | 2.293 ± | 2.381 ± | 2.103 ± | 2.212 ± | 2.597 ± | 1.475 ± | 2.183 ± |
|              |    | 0.217*  | 0.302*  | 0.206*  | 0.236*  | 0.179*  | 0.184*  | 0.210*  | 0.126   | 0.194*  |
|              | 24 | 2.373 ± | 2.673 ± | 1.305 ± | 2.049 ± | 1.325 ± | 1.475 ± | 2.104 ± | 1.028 ± | 1.472 ± |
|              |    | 0.225*  | 0.245*  | 0.184   | 0.197*  | 0.102   | 0.136   | 0.198*  | 0.113   | 0.157   |
| Sulfometuron | 0  | 1.00 ±  | 1.00 ±  | 1.00 ±  | 1.00 ±  | 1.00 ±  | 1.00 ±  | 1.00 ±  | 1.00 ±  | 1.00 ±  |
|              |    | 0.108   | 0.114   | 0.112   | 0.109   | 0.110   | 0.106   | 0.111   | 0.108   | 0.105   |
|              | 3  | 2.489 ± | 2.967 ± | 3.638 ± | 2.574 ± | 2.579 ± | 3.952 ± | 4.476 ± | 3.113 ± | 2.465 ± |

|                    |                     | 0.184 <sup>*</sup>  | 0.219 <sup>*</sup>  | 0.247 <sup>*</sup> | 0.195 <sup>*</sup>  | 0.206 <sup>*</sup> | 0.324 <sup>*</sup>  | 0.308 <sup>*</sup>  | 0.235 <sup>*</sup>  | 0.213 <sup>*</sup> |                    |  |
|--------------------|---------------------|---------------------|---------------------|--------------------|---------------------|--------------------|---------------------|---------------------|---------------------|--------------------|--------------------|--|
| Pyrazosulfu<br>ron | 6                   | 1.487 ±             | 2.572 ±             | 2.954 ±            | 2.135 ±             | 2.163 ±            | 3.174 ±             | 3.102 ±             | 2.712 ±             | 2.104 ±            |                    |  |
|                    |                     | 0.105               | 0.225 <sup>*</sup>  | 0.236 <sup>*</sup> | 0.189 <sup>*</sup>  | 0.195 <sup>*</sup> | 0.228 <sup>*</sup>  | 0.274 <sup>*</sup>  | 0.225 <sup>*</sup>  | 0.125 <sup>*</sup> |                    |  |
|                    |                     |                     |                     |                    |                     |                    |                     |                     |                     |                    |                    |  |
|                    | 12                  | 1.264 ±             | 2.469 ±             | 2.746 ±            | 1.846 ±             | 1.765 ±            | 2.533 ±             | 2.528 ±             | 2.384 ±             | 1.675 ±            |                    |  |
|                    |                     | 0.117               | 0.192 <sup>*</sup>  | 0.227 <sup>*</sup> | 0.158               | 0.154              | 0.252 <sup>*</sup>  | 0.212 <sup>*</sup>  | 0.225 <sup>*</sup>  | 0.119              |                    |  |
|                    | 24                  | 1.141 ±             | 2.103 ±             | 2.429 ±            | 1.457 ±             | 1.354 ±            | 2.106 ±             | 2.294 ±             | 1.948 ±             | 1.382 ±            |                    |  |
|                    |                     | 0.103               | 0.192 <sup>*</sup>  | 0.213 <sup>*</sup> | 0.136               | 0.121              | 0.175 <sup>*</sup>  | 0.193 <sup>*</sup>  | 0.166               | 0.121              |                    |  |
|                    | 0                   | 1.00 ±              | 1.00 ±              | 1.00 ±             | 1.00 ±              | 1.00 ±             | 1.00 ±              | 1.00 ±              | 1.00 ±              | 1.00 ±             |                    |  |
|                    |                     | 0.112               | 0.115               | 0.109              | 0.106               | 0.107              | 0.110               | 0.094               | 0.096               | 0.098              |                    |  |
|                    | 3                   | 3.193 ±             | 4.285 ±             | 3.853 ±            | 2.048 ±             | 2.375 ±            | 2.598 ±             | 3.751 ±             | 3.105 ±             | 2.968 ±            |                    |  |
|                    |                     | 0.271 <sup>*</sup>  | 0.336 <sup>**</sup> | 0.292 <sup>*</sup> | 0.164 <sup>*</sup>  | 0.201 <sup>*</sup> | 0.324 <sup>*</sup>  | 0.327 <sup>*</sup>  | 0.253 <sup>*</sup>  | 0.283 <sup>*</sup> |                    |  |
|                    |                     |                     |                     |                    |                     |                    |                     |                     |                     |                    |                    |  |
|                    | 6                   | 4.284 ±             | 3.162 ±             | 3.476 ±            | 1.574 ±             | 2.103 ±            | 2.346 ±             | 4.548 ±             | 1.752 ±             | 2.457 ±            |                    |  |
|                    |                     | 0.306 <sup>*</sup>  | 0.291 <sup>*</sup>  | 0.269 <sup>*</sup> | 0.126               | 0.184 <sup>*</sup> | 0.205 <sup>*</sup>  | 0.320 <sup>*</sup>  | 0.154               | 0.213 <sup>*</sup> |                    |  |
|                    |                     |                     |                     |                    |                     |                    |                     |                     |                     |                    |                    |  |
|                    | 12                  | 3.481 ±             | 2.476 ±             | 3.102 ±            | 1.395 ±             | 1.358 ±            | 2.104 ±             | 2.958 ±             | 1.534 ±             | 2.182 ±            |                    |  |
| 0.292 <sup>*</sup> |                     | 0.263 <sup>*</sup>  | 0.274 <sup>*</sup>  | 0.113              | 0.125               | 0.176 <sup>*</sup> | 0.225 <sup>*</sup>  | 0.137               | 0.175 <sup>*</sup>  |                    |                    |  |
|                    |                     |                     |                     |                    |                     |                    |                     |                     |                     |                    |                    |  |
| 24                 | 2.958 ±             | 2.103 ±             | 2.174 ±             | 1.202 ±            | 1.249 ±             | 1.467 ±            | 2.472 ±             | 1.372 ±             | 1.563 ±             |                    |                    |  |
|                    | 0.253 <sup>*</sup>  | 0.185 <sup>*</sup>  | 0.192 <sup>*</sup>  | 0.103              | 0.115               | 0.138              | 0.213 <sup>*</sup>  | 0.115               | 0.147               |                    |                    |  |
|                    |                     |                     |                     |                    |                     |                    |                     |                     |                     |                    |                    |  |
| 0                  | 1.00 ±              | 1.00 ±              | 1.00 ±              | 1.00 ±             | 1.00 ±              | 1.00 ±             | 1.00 ±              | 1.00 ±              | 1.00 ±              |                    |                    |  |
|                    | 0.105               | 0.102               | 0.112               | 0.114              | 0.117               | 0.121              | 0.125               | 0.116               | 0.118               |                    |                    |  |
|                    |                     |                     |                     |                    |                     |                    |                     |                     |                     |                    |                    |  |
| Rimsulfuro<br>n    | 3                   | 3.597 ±             | 2.453 ±             | 2.587 ±            | 3.116 ±             | 2.498 ±            | 3.587 ±             | 3.759 ±             | 3.285 ±             | 2.574 ±            |                    |  |
|                    |                     | 0.285 <sup>*</sup>  | 0.221 <sup>*</sup>  | 0.209 <sup>*</sup> | 0.237 <sup>*</sup>  | 0.223 <sup>*</sup> | 0.336 <sup>*</sup>  | 0.294 <sup>*</sup>  | 0.246 <sup>*</sup>  | 0.209 <sup>*</sup> |                    |  |
|                    | 6                   | 4.483 ±             | 3.198 ±             | 2.140 ±            | 2.585 ±             | 2.102 ±            | 2.954 ±             | 3.106 ±             | 2.954 ±             | 2.148 ±            |                    |  |
|                    |                     | 0.317 <sup>*</sup>  | 0.296 <sup>*</sup>  | 0.182 <sup>*</sup> | 0.199 <sup>*</sup>  | 0.164 <sup>*</sup> | 0.182 <sup>*</sup>  | 0.274 <sup>*</sup>  | 0.278 <sup>*</sup>  | 0.195 <sup>*</sup> |                    |  |
|                    | 12                  | 5.648 ±             | 2.284 ±             | 1.483 ±            | 2.147 ±             | 1.365 ±            | 2.463 ±             | 2.587 ±             | 2.756 ±             | 1.476 ±            |                    |  |
|                    |                     | 0.427 <sup>**</sup> | 0.228 <sup>*</sup>  | 0.135              | 0.186 <sup>*</sup>  | 0.126              | 0.217 <sup>*</sup>  | 0.226 <sup>*</sup>  | 0.249 <sup>*</sup>  | 0.139              |                    |  |
|                    | 24                  | 3.174 ±             | 1.035 ±             | 1.205 ±            | 1.934 ±             | 1.241 ±            | 2.212 ±             | 2.142 ±             | 2.392 ±             | 1.291 ±            |                    |  |
|                    |                     | 0.225 <sup>*</sup>  | 0.108               | 0.157              | 0.165               | 0.113              | 0.148 <sup>*</sup>  | 0.183 <sup>*</sup>  | 0.193 <sup>*</sup>  | 0.115              |                    |  |
|                    | 0                   | 1.00 ±              | 1.00 ±              | 1.00 ±             | 1.00 ±              | 1.00 ±             | 1.00 ±              | 1.00 ±              | 1.00 ±              | 1.00 ±             |                    |  |
|                    |                     | 0.109               | 0.112               | 0.109              | 0.114               | 0.112              | 0.106               | 0.095               | 0.098               | 0.097              |                    |  |
|                    | 3                   | 2.498 ±             | 2.962 ±             | 3.593 ±            | 4.235 ±             | 3.594 ±            | 4.206 ±             | 5.205 ±             | 4.698 ±             | 3.574 ±            |                    |  |
|                    |                     | 0.205 <sup>*</sup>  | 0.217 <sup>*</sup>  | 0.236 <sup>*</sup> | 0.293 <sup>*</sup>  | 0.225 <sup>*</sup> | 0.326 <sup>*</sup>  | 0.417 <sup>**</sup> | 0.308 <sup>*</sup>  | 0.371 <sup>*</sup> |                    |  |
|                    |                     |                     |                     |                    |                     |                    |                     |                     |                     |                    |                    |  |
|                    | Ethametsulf<br>uron | 6                   | 3.194 ±             | 4.681 ±            | 5.673 ±             | 3.597 ±            | 4.182 ±             | 3.384 ±             | 4.746 ±             | 3.567 ±            | 2.473 ±            |  |
|                    |                     |                     | 0.283 <sup>*</sup>  | 0.305 <sup>*</sup> | 0.401 <sup>**</sup> | 0.312 <sup>*</sup> | 0.381 <sup>**</sup> | 0.347 <sup>**</sup> | 0.358 <sup>**</sup> | 0.251 <sup>*</sup> | 0.228 <sup>*</sup> |  |
|                    |                     | 12                  | 2.971 ±             | 3.587 ±            | 3.275 ±             | 3.104 ±            | 2.053 ±             | 2.915 ±             | 3.179 ±             | 3.193 ±            | 2.145 ±            |  |
| 0.283 <sup>*</sup> |                     |                     | 0.245 <sup>*</sup>  | 0.221 <sup>*</sup> | 0.273 <sup>*</sup>  | 0.152 <sup>*</sup> | 0.238 <sup>*</sup>  | 0.225 <sup>*</sup>  | 0.253 <sup>*</sup>  | 0.182 <sup>*</sup> |                    |  |
| 24                 |                     | 2.752 ±             | 2.583 ±             | 2.597 ±            | 2.953 ±             | 1.427 ±            | 1.759 ±             | 2.487 ±             | 2.576 ±             | 1.847 ±            |                    |  |
|                    |                     | 0.226 <sup>*</sup>  | 0.218 <sup>*</sup>  | 0.232 <sup>*</sup> | 0.194 <sup>*</sup>  | 0.101              | 0.112               | 0.124               | 0.136               | 0.129              |                    |  |

Table S2 Gene Primers

| Gene name   | Primer sequence                | Function                       |
|-------------|--------------------------------|--------------------------------|
| MdUGT73B36  | F: GTCGAAATCAAAACCATC          | For Real-time PCR              |
|             | R: ACTTTGCAGCTGCATCAG          |                                |
| MdUGT73B37  | F: GGAGAAAGAGGATTGGCTG         | For Real-time PCR              |
|             | R: CTCGTTGTAAACTGCTCC          |                                |
| MdUGT73B38  | F: TAGGATGGAAGGGAAAGG          | For Real-time PCR              |
|             | R: CCATTTTTGAGCACCAAC          |                                |
| MdUGT73B39  | F: GACACGAGCCCAAGTTCC          | For Real-time PCR              |
|             | R: GCTTTCATCCCAAGCACG          |                                |
| MdUGT73B40  | F: GCTGAGAAAACGAGCTATGG        | For Real-time PCR              |
|             | R: TGAATTTAGCCATGCTTCC         |                                |
| MdUGT73CG21 | F: GGAGGGTTCTTAACACACTG        | For Real-time PCR              |
|             | R: CACCAACACCCCAATCTTC         |                                |
| MdUGT73CG22 | F: CCATCGTCACTACGCAGCAC        | For Real-time PCR              |
|             | R: CTTCTCTGCTTGTTGTTGC         |                                |
| MdUGT73CP3  | F: TCTAGACCTCCTGCTTCATATATGAT  | For Real-time PCR              |
|             | R: GGATCCCTCCTCTCCTTAGTTTGTCTG |                                |
| MdUGT73CR7  | F: GGATTGCAGATGTCATAAC         | For Real-time PCR              |
|             | R: CACTCTAGAGCCTCATTGAG        |                                |
| MdUGT73CG22 | F: GGATCCATGATATTCTATCCATCC    | Full-length gene amplification |
|             | R: GAATTCTTAGTTTGTCTGTCTG      |                                |

Table S3 Nucleotide and amino acid sequences of MdUGT73CG22

## cDNA sequences

AGGAAGCAAGTTATGTGAAGTGGCTAAACAGAGTCCACATAACTGAGTAGAGTGAAAT  
 GTTAGGATAAGAACACCAATAAATTTGTAAGCTCTCACGTCAGCAGCGGCAAATTGCAT  
 CATTGTCCCGTAGCAAGAGAGAGATGCTATATCCCTCGAGTAACAAGCGAACCTCCTG  
 CTTTCATAT**ATG**ATATTCTATCCATCCAATTTTCTTCCCAATACCATGGCGTCCGGAGAGCC

CCAGCTTCACTTTGTTATGTTTCCTTTCATGGCCCAAGGCCACATGATACCCATGATCGA  
CATCGCTAGACTCTTGCGCAAAGAGGCATCATCATCACCATCGTCACTACGCAGCAC  
AATGCGGCGCGATTTCAAAACGTTTTGACTCGTGCTGTGCAGTCGGGCCTCCAAATGA  
GGGTAGCCCTACTAGAATTTCCATGCGAAAAAGCGGGGTGCCTGCTGGGTGTGAGAA  
CCTTGACCTGCTTCCGTTCGCATGGATTGGCGGCGCACTTCTTTTTTGCAACGGGTCTGT  
TGCAACAACAAGCAGAGAAGTTGTTTGAAGAGTTAACCCCCGAGCCAAGCTGCATATT  
CTCCGATATGTGTTTTCCGTGGACGGTGAAAATTTCCCACAAGTTTAACATTCCAAGGA  
TATCTTTCAGTGGATTCTGCACATTTTGTCTCCTTTGCATTAACAACTTCAGGCGTCGA  
AAGTTCATGAGAATTTAAGCTCTGAAACGGAGTACTTTGTTGTGCCTGACTTGCCTGAT  
CGAATTGAGGCCACGAAAGCTCAGCTGCCAGGCCCTGACTCCAAGTATGTCAGGGT  
TTTTGGATAAAATTGTTGCAGCTGAATTGGAACATTTGGGATAATCATGAATACTTTTG  
AAGAGTTGGAGCCGGCATATATTGAAGCGTACAAGAAGACGGCGAAAGTCTGGTGCAT  
TGGCCCAGCTTCACTGAGCAACAAAGATGACTTGGACAAGGCGCAGAGGGGTAACAA  
GGCCTCCATTGATGAACAGCACTGCTTGAAGTGGCTTGATTCTTGGGAACCAAGTTCT  
GTAATTTATGCTTGCCTCGGAAGTTTATGCAATCTTGTGTGTGAACAATTGATAGAGCTT  
GGACTGGCCTTAGAGGCATCGAACAAAACGTTCAATTTGGGTTGTAAGGGGATGCAGTC  
AATCAGAAGAGTTGGAAAAATGGATTTCTGAGAGTGAATTTGAAGAAAGAACGAAGG  
GAAGGAGCCTCGTTATTTGGGGATGGGCTCCGCAAACACTCATATTGTCACACCGTGC  
AGTTGGGGGGTTCTTAACACATTGTGGATGGAACCTCGATAATGGAAGGGATATGTGCCG  
GGCTGCCCTTGATCACATGGCCACTGTTTGGGGACCAGTTCCTTAATGAAAACTAGTT  
GTGCAGGTTCTTAAAATTGCGGTGAGCGTTGGGGTGGAGTATCCGGTAAAGTGGGGAG  
AGGAAGAGAAGATTGGCGTGCTGGTGAAAAGGGAAAATGTAACAAAAGCGATAGAG  
AAGGTGATGGATGGAGAAGAAAGTGAAGGGAGAAGAGAGAGAGCCAGAGAGTTTGG  
AGAGATGGCAAAGAGAGCAGCAGAAGAAGGAGGATCGTCTCACGTCAACGTTTCACA  
GCTTATCCAAGATATCGTGCAACAAAGTAGTAATGGCAGACAGACAAACTAAGGAGAG  
GAGAATACAAGGGACTTGCTGCTCCATCTCAACTGAAAGAGCTTCTTGTCTCATGTACT  
GTAAACATGTCATTTGTTGCAAAATTAGTTTTCTTTTCTTTTCTTCTCTGTAGATTTAT  
ACTTCAGAAACAATTGATACACCTGCTTTACTTA

Amino acid sequences

MIFYPSNFLPNTMASGEPQLHFVMFPFMAQGHMIPMIDIARLLAQRGIIITIVTTQHNAARF  
QNVLTRAVQSGLQMRVALLEFPCEKAGLPAGCENLDLLPSHGLAAHFFFATGLLQQQAEK  
LFEELTEPSCIFSDMCFPWTVKISHKFNIPRISFSGFCTFCLLCINKLQASKVHENLSSETEY  
FVVPDLPDRIEATKAQLPGPLTPSMGFLDKIVAAELETFGIIMNTFEELEPAYIEAYKKTAK  
VWCIGPASLSNKDDLDKAQRGNKASIDEQHCLKWLDSWEPSSVIYACLGSLCNLVCEQLI  
ELGLALEASNKTFIWVVRGCSQSEELEKWISESEFEERTKGRSLVIWGWAPQTLILSHRAV  
GGFLTHCGWNSIMEGICAGLPLITWPLFGDQFLNEKLVVQVLKIAVSVGVEYPVKWGEEE  
KIGVLVKRENVTKAIEKVMDGEESEGRRERAREFGEMAKRAAEEGGSSHVNVSQLIQDIV  
QQSSNGRQTN
