# Supplementary material for: First Clarification of the Involvement of Glycosyltransferase MdUGT73CG22 in the Detoxification Metabolism of Nicosulfuron in Apple
Source: MDPI journal article supplement (doi:10.3390/plants13091171), 2024-04-23

Figure S1. Vector construction map of the final construction. (a) Construction of prokaryotic expression vector pEGX-2T; (b) Construction of Plant Expression Vector PBI121.

a

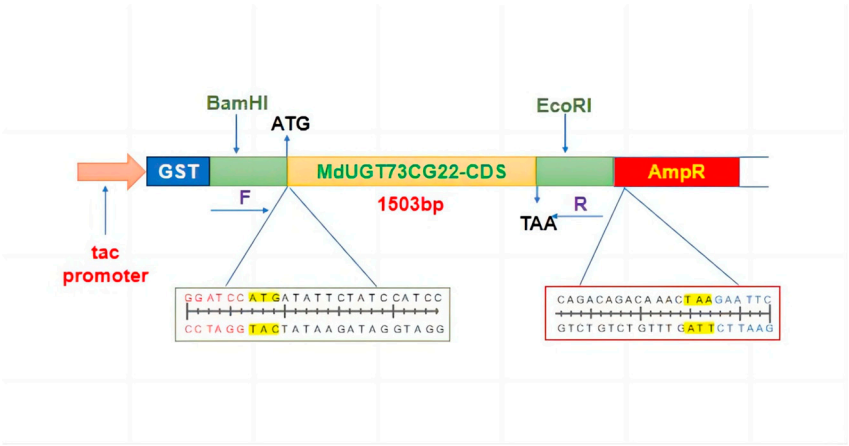

b

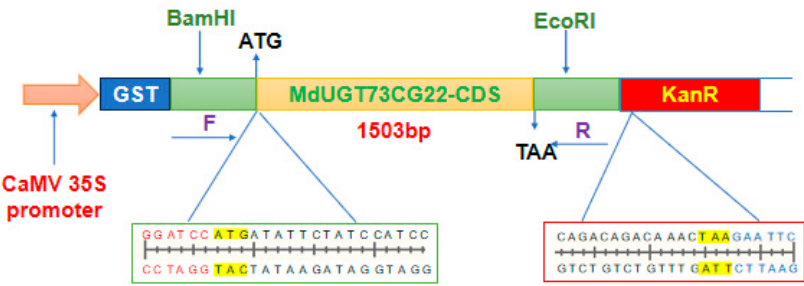

Supplement: s1 [file s1]
